# Supplementary material for: Unraveling the Guardians of Growth: A Comprehensive Analysis of the Aux/IAA and ARF Gene Families in Populus simonii
Source: MDPI journal article supplement (doi:10.3390/plants12203566), 2023-10-13
Supplement: s1 [file s1]

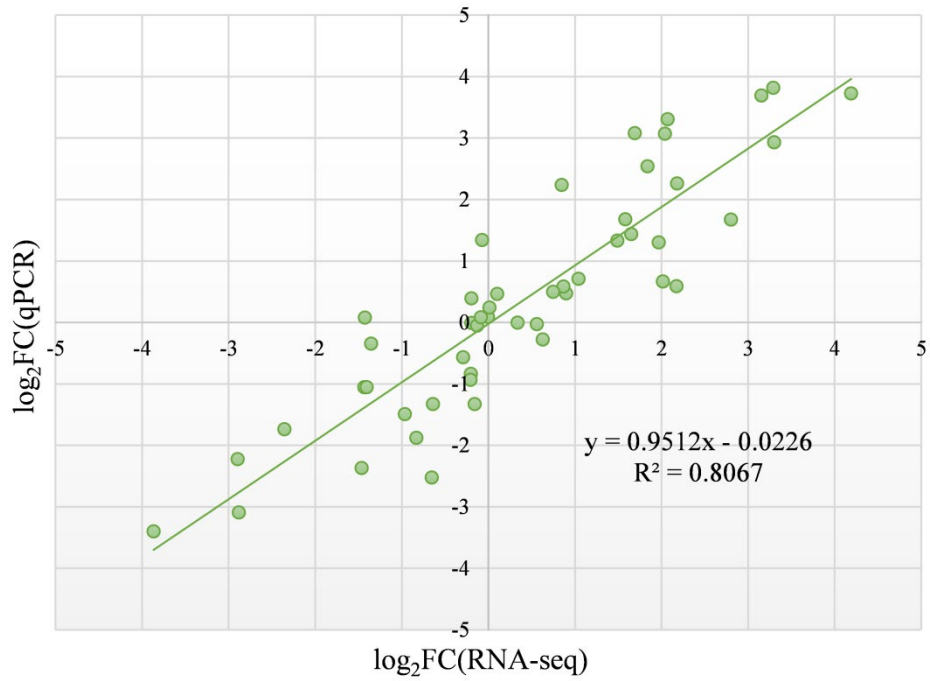

**Supplemental Figure S1.** Correlation between relative expression of qPCR data and FPKM values of RNA-seq data. X-axis represents  $\log_2\text{FC}(\text{qPCR})$ , Y-axis represents  $\log_2\text{FC}(\text{RNA-seq})$ .
